# Supplementary material for: Multi-omic Profiling Reveals that Intra-abdominal-Hypertension-Induced Intestinal Damage Can Be Prevented by Microbiome and Metabolic Modulations with 5-Hydroxyindoleacetic Acid as a Diagnostic Marker
Source: PubMed Central journal article supplement (PMC9238425; doi:10.1128/msystems.01204-21), 2022-05-16
Supplement: msystems.01204-21-s0010.pdf [file msystems.01204-21-s0010.pdf]

## The detailed information of Elisa kits

| <b>Catalog NO.</b> | <b>Product Name</b>                       | <b>Standard product detection range</b> |
|--------------------|-------------------------------------------|-----------------------------------------|
| E02D0032           | Rat Diamine Oxidase (DAO)                 | 0-10 mmol/L                             |
| E02L0004           | Rat Lactic Acid (LA)                      | 0-1000pg/ml                             |
| E02I0010           | Rat Interleukin 1 $\beta$ (IL-1 $\beta$ ) | 0-1000pg/ml                             |
| E02G0367           | Rat Reduced glutathione (GSH)             | 0-25ng/mL                               |
| E02M0023           | Rat Malondialdehyde (MDA)                 | 0-50ng/mL                               |
| E02H0106           | Rat Hydroxytryptamine (5-HT)              | 0-100ng/mL                              |
| E01H0106           | Human 5-Hydroxytryptamine (5-HT)          | 0-100ng/mL                              |
| E02H0320           | Rat 5 Hydroxyindoleacetic Acid (5-HIAA)   | 0-1000ng/mL                             |
| E01H0320           | Human 5 Hydroxyindoleacetic Acid (5-HIAA) | 0-50ng/mL                               |
